# Supplementary material
Source: Springer Nature journal article supplement (https://www.springermedizin.de/resource/supplementary/13256_2010_1727_MOESM1_ESM.pdf/9648304)

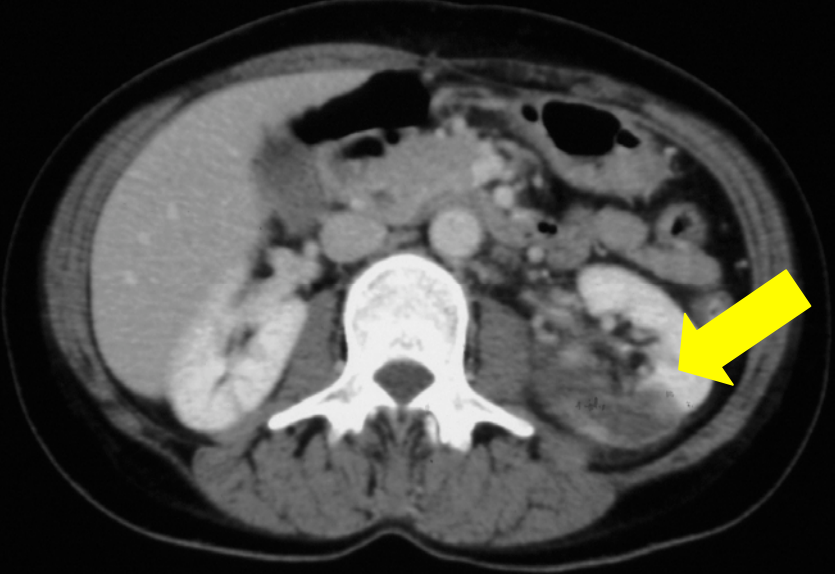

Supplement: MOESM1 [file 9648304]
